# Supplementary material for: Facile deposition of FeNi/Ni hybrid nanoflower electrocatalysts for effective and sustained water oxidation
Source: Royal Society of Chemistry journal article supplement (doi:10.1039/d3na00298e), 2023-01-01
Supplement: d3na00298e1.pdf [file d3na00298e1.pdf]

## **Electronic Supplementary Information**

### **Facile deposition of FeNi/Ni hybrid nanoflower electrocatalyst for effective and sustained water oxidation**

Muhammad Ali Ehsan<sup>1</sup>, Abuzar Khan<sup>1\*</sup>, Munzir H. Suliman<sup>1</sup>, Mohamed Javid<sup>2</sup>

<sup>1</sup>Interdisciplinary Research Center for Hydrogen and Energy Storage (IRC-HES),

<sup>2</sup>Core Research Facilities, King Fahd University of Petroleum & Minerals, Box 5040, Dhahran  
31261, Saudi Arabia

Corresponding author E-mail: [abuzar@kfupm.edu.sa](mailto:abuzar@kfupm.edu.sa)

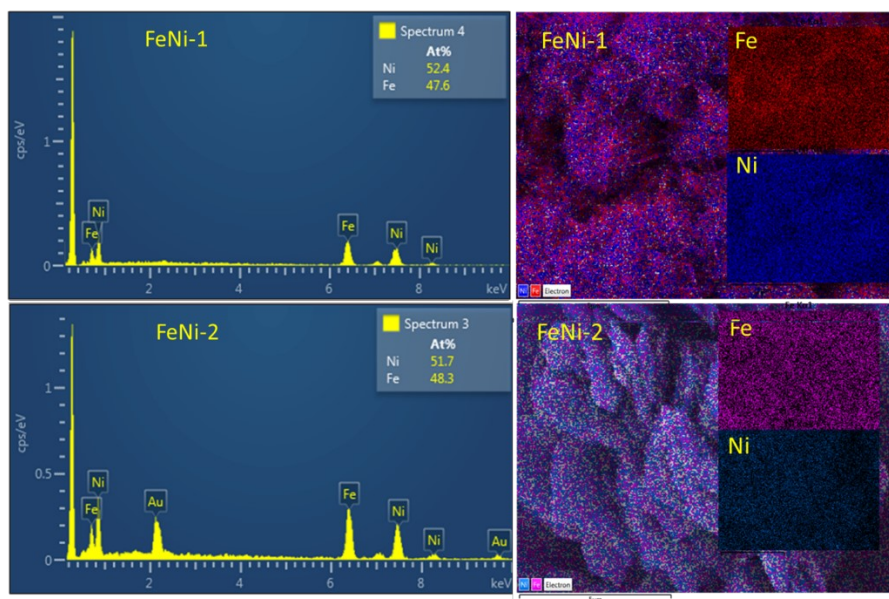

**Figure S1:** EDX spectra and corresponding elemental maps of Fe and Ni elements of the developed FeNi/Ni-1h and FeNi/Ni-2h electrocatalysts by AACVD.

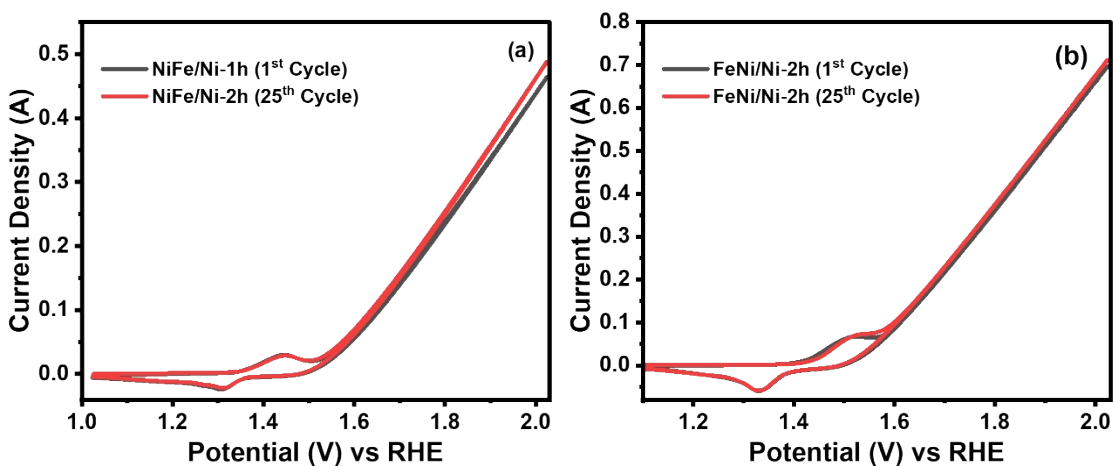

**Figure S2:** Electrocatalytic investigations; concurrent 1<sup>st</sup> and 25<sup>th</sup> cyclic voltammetry curves for (a) FeNi/Ni-1h ; (b) FeNi/Ni-2h ; recorded at a scan rate of 50 mV sec<sup>-1</sup> in 1.0 M KOH electrolyte solution.

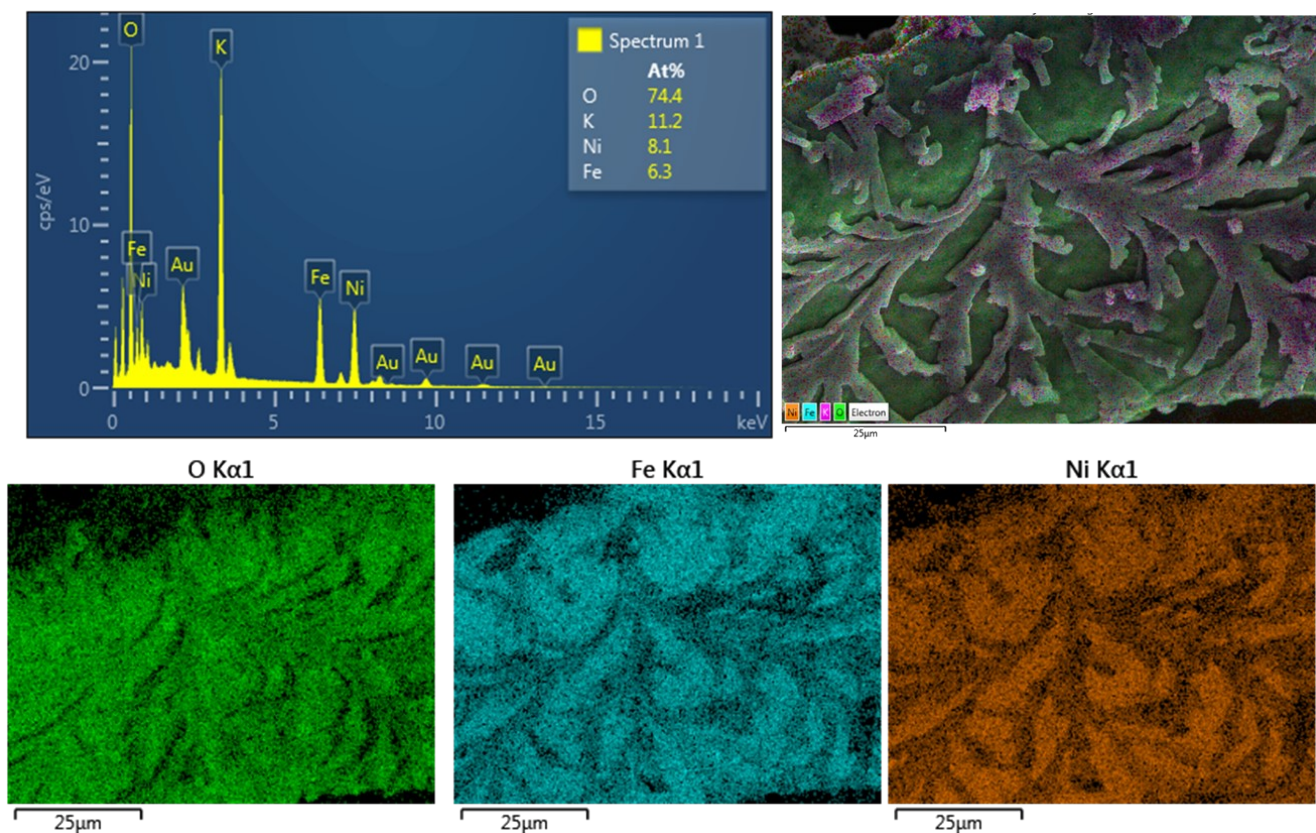

**Figure S3:** EDX analysis of FeNi/Ni-2h catalysts with corresponding elemental ratio after 100 h of chronopotentiometric (OER stability) testing. EDX map indicating the homogenous distribution of Fe, Ni and O atoms on the surface of catalyst after chronopotentiometric testing.
